# Supplementary material for: The moment of communicating the diagnosis of neuromuscular diseases: an integrative review
Source: Research Square preprint supplement (doi:10.21203/rs.3.rs-560153/v1), 2021-05-26
Supplement: Supplementary file 1 [file 9a84b9e8760e027275d209db.doc]

Table 1. Diagnosis of Duchenne muscular dystrophy:

| Author, year | Study country | Families  Invited  accepted | N (♀) | T | Age at the time of the interview | Pre- or post-test genetic counseling | Degree of satisfaction (DS) | DS related factor | Guide-protocol questionnaire described | Diagnosis given jointly to both parents | Evaluation form | Randomization |
| --- | --- | --- | --- | --- | --- | --- | --- | --- | --- | --- | --- | --- |
| [Firth MA](https://www.ncbi.nlm.nih.gov/pubmed/?term=Firth MA%5BAuthor%5D&cauthor=true&cauthor_uid=6402212), 1983 | Great Britain | 66-53 | 69 (53) | 2-5 anos | > 4 anos | Don't quote | 72% | Diagnostic time | Don't quote | 18 (34%) | Interview  recorded | Don't quote |

N: number of family members interviewed; T: time (years elapsed between the first symptoms and the diagnosis), DS: degree of satisfaction (time of diagnosis), NS: not satisfied
